# Supplementary material
Source: HighWire-hosted journal article supplement (https://gut.bmj.com/content/70/1/76)

**Non-users versus current PPI users among all patients who were tested for SARS-CoV-2**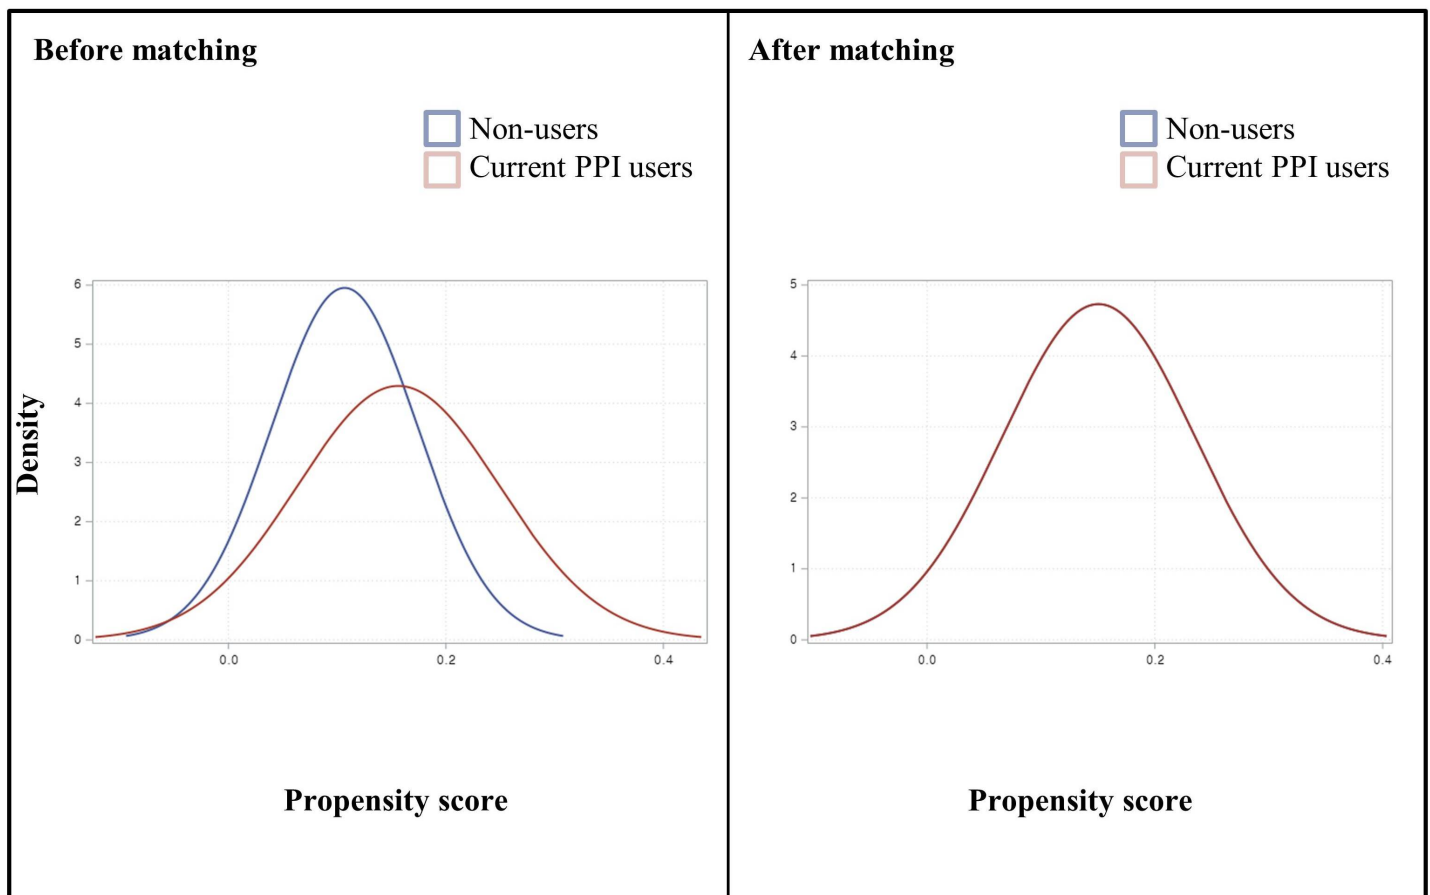

Supplement: inline-supplementary-material-1 [file inline-supplementary-material-1.pdf]
