# Supplementary material
Source: HighWire-hosted journal article supplement (https://gut.bmj.com/content/70/1/76)

**Non-users versus current PPI users among patients with confirmed COVID-19**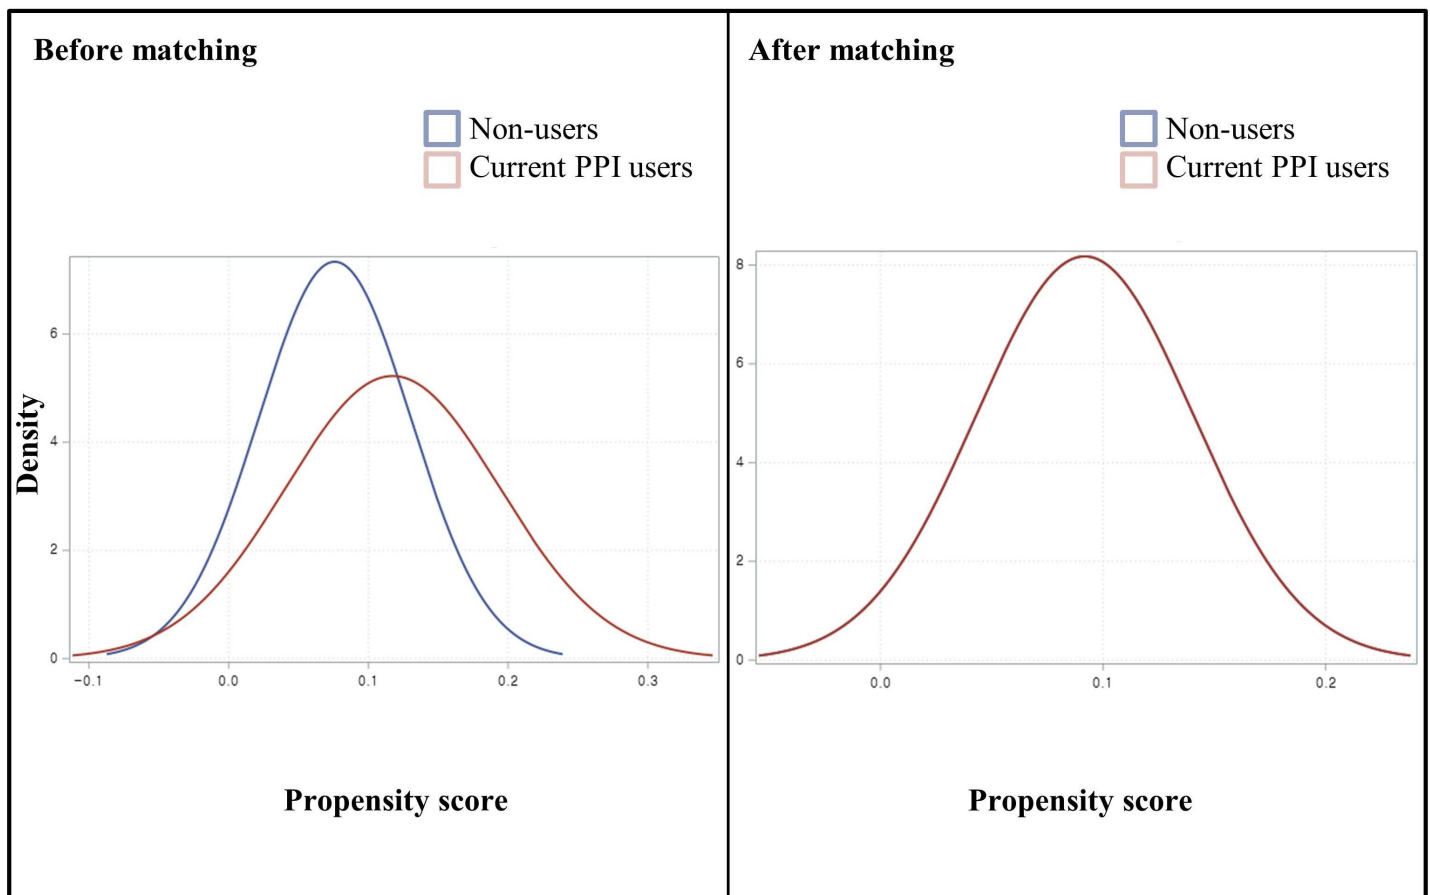

Supplement: inline-supplementary-material-3 [file inline-supplementary-material-3.pdf]
