# Supplementary material
Source: HighWire-hosted journal article supplement (https://gut.bmj.com/content/70/1/76)

**Non-users versus past PPI users among all patients who were tested for SARS-CoV-2**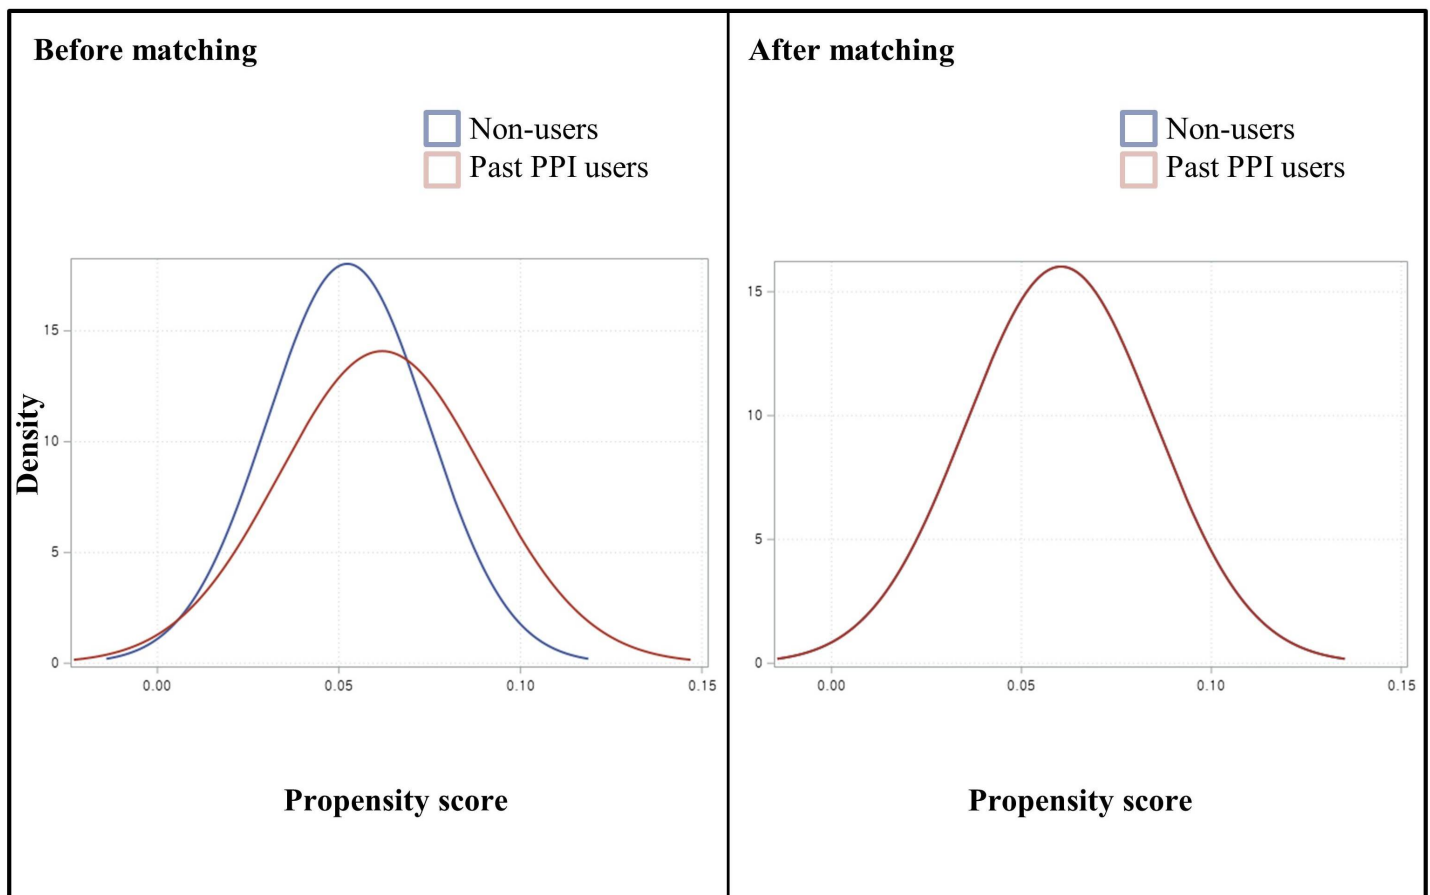

Supplement: inline-supplementary-material-2 [file inline-supplementary-material-2.pdf]

**Non-users versus past PPI users among patients with confirmed COVID-19**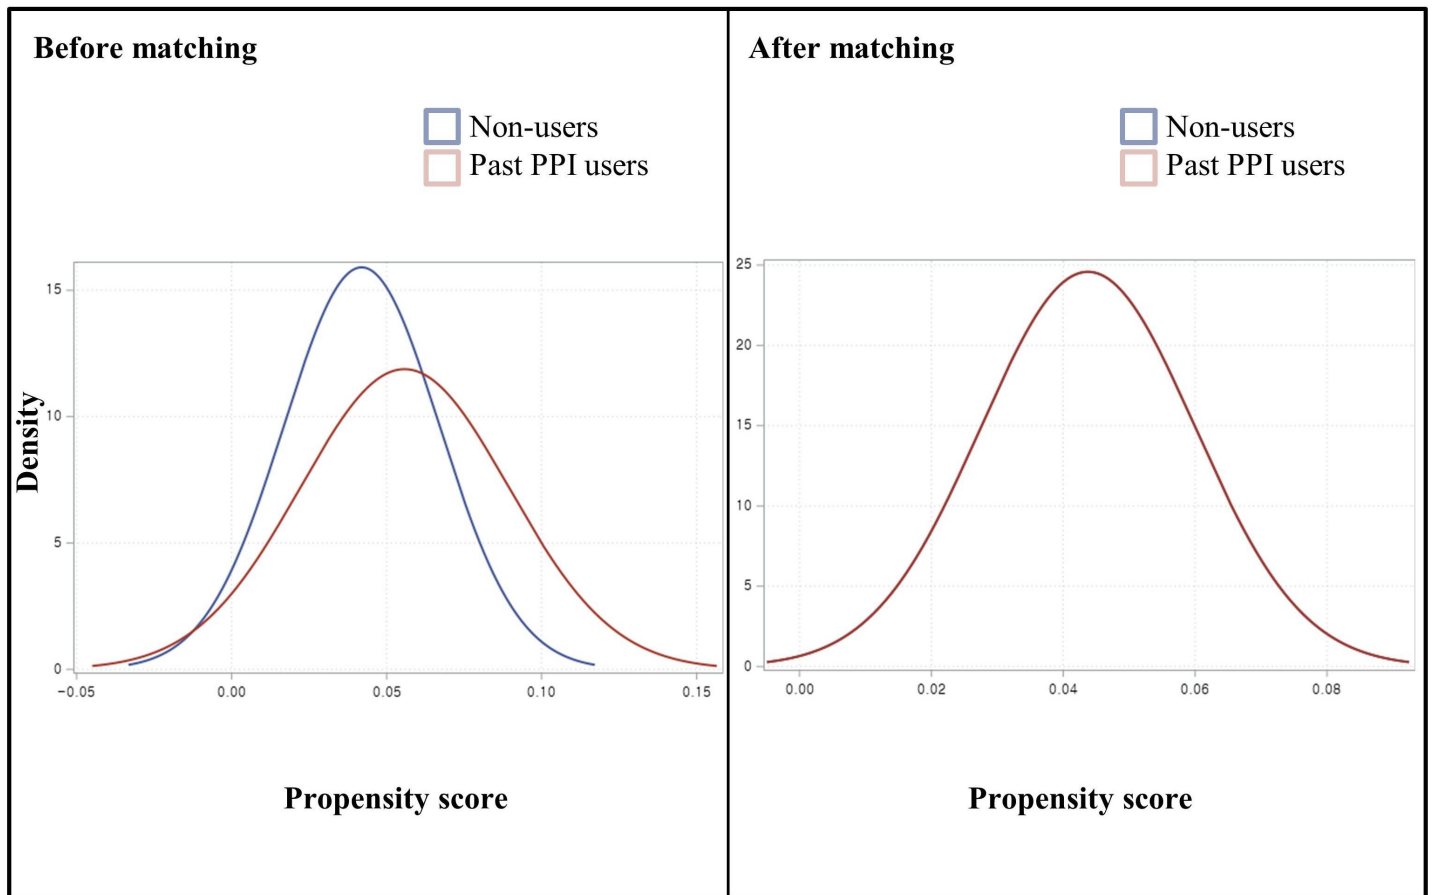

Supplement: inline-supplementary-material-4 [file inline-supplementary-material-4.pdf]
